# Supplementary material for: Bias Correction in Monthly Records of Satellite Soil Moisture Using Nonuniform CDFs
Source: Hindawi journal article supplement (doi:10.1155/2018/1908570), 2018-07-16
Supplement: f1 [file 1908570.f1.zip]

Archive with 376 entries (376 files):
- 1908570_CDF_material/2012_sm00-10cm_daily_ZDB_ZHY_50639_366days_allin.txt
- 1908570_CDF_material/2012_sm00-10cm_daily_ZDB_ZHY_50833_366days_allin.txt
- 1908570_CDF_material/2012_sm00-10cm_daily_ZDB_ZHY_50838_366days_allin.txt
- 1908570_CDF_material/2012_sm00-10cm_daily_ZDB_ZHY_50934_366days_allin.txt
- 1908570_CDF_material/2012_sm00-10cm_daily_ZDB_ZHY_50937_366days_allin.txt
- 1908570_CDF_material/2012_sm00-10cm_daily_ZDB_ZHY_52679_366days_allin.txt
- 1908570_CDF_material/2012_sm00-10cm_daily_ZDB_ZHY_52797_366days_allin.txt
- 1908570_CDF_material/2012_sm00-10cm_daily_ZDB_ZHY_53289_366days_allin.txt
- 1908570_CDF_material/2012_sm00-10cm_daily_ZDB_ZHY_53368_366days_allin.txt
- 1908570_CDF_material/2012_sm00-10cm_daily_ZDB_ZHY_53378_366days_allin.txt
- 1908570_CDF_material/2012_sm00-10cm_daily_ZDB_ZHY_53467_366days_allin.txt
- 1908570_CDF_material/2012_sm00-10cm_daily_ZDB_ZHY_53475_366days_allin.txt
- 1908570_CDF_material/2012_sm00-10cm_daily_ZDB_ZHY_53486_366days_allin.txt
- 1908570_CDF_material/2012_sm00-10cm_daily_ZDB_ZHY_53488_366days_allin.txt
- 1908570_CDF_material/2012_sm00-10cm_daily_ZDB_ZHY_53490_366days_allin.txt
- 1908570_CDF_material/2012_sm00-10cm_daily_ZDB_ZHY_53505_366days_allin.txt
- 1908570_CDF_material/2012_sm00-10cm_daily_ZDB_ZHY_53513_366days_allin.txt
- 1908570_CDF_material/2012_sm00-10cm_daily_ZDB_ZHY_53553_366days_allin.txt
- 1908570_CDF_material/2012_sm00-10cm_daily_ZDB_ZHY_53565_366days_allin.txt
- 1908570_CDF_material/2012_sm00-10cm_daily_ZDB_ZHY_53574_366days_allin.txt
- 1908570_CDF_material/2012_sm00-10cm_daily_ZDB_ZHY_53578_366days_allin.txt
- 1908570_CDF_material/2012_sm00-10cm_daily_ZDB_ZHY_53582_366days_allin.txt
- 1908570_CDF_material/2012_sm00-10cm_daily_ZDB_ZHY_53584_366days_allin.txt
- 1908570_CDF_material/2012_sm00-10cm_daily_ZDB_ZHY_53585_366days_allin.txt
- 1908570_CDF_material/2012_sm00-10cm_daily_ZDB_ZHY_53644_366days_allin.txt
- 1908570_CDF_material/2012_sm00-10cm_daily_ZDB_ZHY_53662_366days_allin.txt
- 1908570_CDF_material/2012_sm00-10cm_daily_ZDB_ZHY_53663_366days_allin.txt
- 1908570_CDF_material/2012_sm00-10cm_daily_ZDB_ZHY_53665_366days_allin.txt
- 1908570_CDF_material/2012_sm00-10cm_daily_ZDB_ZHY_53666_366days_allin.txt
- 1908570_CDF_material/2012_sm00-10cm_daily_ZDB_ZHY_53669_366days_allin.txt
- 1908570_CDF_material/2012_sm00-10cm_daily_ZDB_ZHY_53673_366days_allin.txt
- 1908570_CDF_material/2012_sm00-10cm_daily_ZDB_ZHY_53681_366days_allin.txt
- 1908570_CDF_material/2012_sm00-10cm_daily_ZDB_ZHY_53725_366days_allin.txt
- 1908570_CDF_material/2012_sm00-10cm_daily_ZDB_ZHY_53735_366days_allin.txt
- 1908570_CDF_material/2012_sm00-10cm_daily_ZDB_ZHY_53740_366days_allin.txt
- 1908570_CDF_material/2012_sm00-10cm_daily_ZDB_ZHY_53748_366days_allin.txt
- 1908570_CDF_material/2012_sm00-10cm_daily_ZDB_ZHY_53754_366days_allin.txt
- 1908570_CDF_material/2012_sm00-10cm_daily_ZDB_ZHY_53759_366days_allin.txt
- 1908570_CDF_material/2012_sm00-10cm_daily_ZDB_ZHY_53763_366days_allin.txt
- 1908570_CDF_material/2012_sm00-10cm_daily_ZDB_ZHY_53764_366days_allin.txt
- 1908570_CDF_material/2012_sm00-10cm_daily_ZDB_ZHY_53767_366days_allin.txt
- 1908570_CDF_material/2012_sm00-10cm_daily_ZDB_ZHY_53776_366days_allin.txt
- 1908570_CDF_material/2012_sm00-10cm_daily_ZDB_ZHY_53783_366days_allin.txt
- 1908570_CDF_material/2012_sm00-10cm_daily_ZDB_ZHY_53789_366days_allin.txt
- 1908570_CDF_material/2012_sm00-10cm_daily_ZDB_ZHY_53791_366days_allin.txt
- 1908570_CDF_material/2012_sm00-10cm_daily_ZDB_ZHY_53797_366days_allin.txt
- 1908570_CDF_material/2012_sm00-10cm_daily_ZDB_ZHY_53853_366days_allin.txt
- 1908570_CDF_material/2012_sm00-10cm_daily_ZDB_ZHY_53856_366days_allin.txt
- 1908570_CDF_material/2012_sm00-10cm_daily_ZDB_ZHY_53857_366days_allin.txt
- 1908570_CDF_material/2012_sm00-10cm_daily_ZDB_ZHY_53859_366days_allin.txt
- 1908570_CDF_material/2012_sm00-10cm_daily_ZDB_ZHY_53863_366days_allin.txt
- 1908570_CDF_material/2012_sm00-10cm_daily_ZDB_ZHY_53865_366days_allin.txt
- 1908570_CDF_material/2012_sm00-10cm_daily_ZDB_ZHY_53872_366days_allin.txt
- 1908570_CDF_material/2012_sm00-10cm_daily_ZDB_ZHY_53873_366days_allin.txt
- 1908570_CDF_material/2012_sm00-10cm_daily_ZDB_ZHY_53874_366days_allin.txt
- 1908570_CDF_material/2012_sm00-10cm_daily_ZDB_ZHY_53878_366days_allin.txt
- 1908570_CDF_material/2012_sm00-10cm_daily_ZDB_ZHY_53879_366days_allin.txt
- 1908570_CDF_material/2012_sm00-10cm_daily_ZDB_ZHY_53882_366days_allin.txt
- 1908570_CDF_material/2012_sm00-10cm_daily_ZDB_ZHY_53884_366days_allin.txt
- 1908570_CDF_material/2012_sm00-10cm_daily_ZDB_ZHY_53886_366days_allin.txt
- 1908570_CDF_material/2012_sm00-10cm_daily_ZDB_ZHY_53888_366days_allin.txt
- 1908570_CDF_material/2012_sm00-10cm_daily_ZDB_ZHY_53915_366days_allin.txt
- 1908570_CDF_material/2012_sm00-10cm_daily_ZDB_ZHY_53926_366days_allin.txt
- 1908570_CDF_material/2012_sm00-10cm_daily_ZDB_ZHY_53929_366days_allin.txt
- 1908570_CDF_material/2012_sm00-10cm_daily_ZDB_ZHY_53937_366days_allin.txt
- 1908570_CDF_material/2012_sm00-10cm_daily_ZDB_ZHY_53941_366days_allin.txt
- 1908570_CDF_material/2012_sm00-10cm_daily_ZDB_ZHY_53942_366days_allin.txt
- 1908570_CDF_material/2012_sm00-10cm_daily_ZDB_ZHY_53954_366days_allin.txt
- 1908570_CDF_material/2012_sm00-10cm_daily_ZDB_ZHY_53956_366days_allin.txt
- 1908570_CDF_material/2012_sm00-10cm_daily_ZDB_ZHY_53966_366days_allin.txt
- 1908570_CDF_material/2012_sm00-10cm_daily_ZDB_ZHY_53967_366days_allin.txt
- 1908570_CDF_material/2012_sm00-10cm_daily_ZDB_ZHY_53970_366days_allin.txt
- 1908570_CDF_material/2012_sm00-10cm_daily_ZDB_ZHY_53973_366days_allin.txt
- 1908570_CDF_material/2012_sm00-10cm_daily_ZDB_ZHY_54026_366days_allin.txt
- 1908570_CDF_material/2012_sm00-10cm_daily_ZDB_ZHY_54047_366days_allin.txt
- 1908570_CDF_material/2012_sm00-10cm_daily_ZDB_ZHY_54213_366days_allin.txt
- 1908570_CDF_material/2012_sm00-10cm_daily_ZDB_ZHY_54218_366days_allin.txt
- 1908570_CDF_material/2012_sm00-10cm_daily_ZDB_ZHY_54223_366days_allin.txt
- 1908570_CDF_material/2012_sm00-10cm_daily_ZDB_ZHY_54231_366days_allin.txt
- 1908570_CDF_material/2012_sm00-10cm_daily_ZDB_ZHY_54305_366days_allin.txt
- 1908570_CDF_material/2012_sm00-10cm_daily_ZDB_ZHY_54311_366days_allin.txt
- 1908570_CDF_material/2012_sm00-10cm_daily_ZDB_ZHY_54320_366days_allin.txt
- 1908570_CDF_material/2012_sm00-10cm_daily_ZDB_ZHY_54405_366days_allin.txt
- 1908570_CDF_material/2012_sm00-10cm_daily_ZDB_ZHY_54429_366days_allin.txt
- 1908570_CDF_material/2012_sm00-10cm_daily_ZDB_ZHY_54430_366days_allin.txt
- 1908570_CDF_material/2012_sm00-10cm_daily_ZDB_ZHY_54502_366days_allin.txt
- 1908570_CDF_material/2012_sm00-10cm_daily_ZDB_ZHY_54596_366days_allin.txt
- 1908570_CDF_material/2012_sm00-10cm_daily_ZDB_ZHY_54710_366days_allin.txt
- 1908570_CDF_material/2012_sm00-10cm_daily_ZDB_ZHY_54817_366days_allin.txt
- 1908570_CDF_material/2012_sm00-10cm_daily_ZDB_ZHY_55591_366days_allin.txt
- 1908570_CDF_material/2012_sm00-10cm_daily_ZDB_ZHY_56038_366days_allin.txt
- 1908570_CDF_material/2012_sm00-10cm_daily_ZDB_ZHY_56074_366days_allin.txt
- 1908570_CDF_material/2012_sm00-10cm_daily_ZDB_ZHY_56080_366days_allin.txt
- 1908570_CDF_material/2012_sm00-10cm_daily_ZDB_ZHY_56093_366days_allin.txt
- 1908570_CDF_material/2012_sm00-10cm_daily_ZDB_ZHY_56164_366days_allin.txt
- 1908570_CDF_material/2012_sm00-10cm_daily_ZDB_ZHY_56168_366days_allin.txt
- 1908570_CDF_material/2012_sm00-10cm_daily_ZDB_ZHY_56172_366days_allin.txt
- 1908570_CDF_material/2012_sm00-10cm_daily_ZDB_ZHY_56180_366days_allin.txt
- 1908570_CDF_material/2012_sm00-10cm_daily_ZDB_ZHY_56184_366days_allin.txt
- 1908570_CDF_material/2012_sm00-10cm_daily_ZDB_ZHY_56185_366days_allin.txt
- 1908570_CDF_material/2012_sm00-10cm_daily_ZDB_ZHY_56192_366days_allin.txt
- 1908570_CDF_material/2012_sm00-10cm_daily_ZDB_ZHY_56462_366days_allin.txt
- 1908570_CDF_material/2012_sm00-10cm_daily_ZDB_ZHY_56598_366days_allin.txt
- 1908570_CDF_material/2012_sm00-10cm_daily_ZDB_ZHY_56666_366days_allin.txt
- 1908570_CDF_material/2012_sm00-10cm_daily_ZDB_ZHY_56675_366days_allin.txt
- 1908570_CDF_material/2012_sm00-10cm_daily_ZDB_ZHY_56691_366days_allin.txt
- 1908570_CDF_material/2012_sm00-10cm_daily_ZDB_ZHY_56693_366days_allin.txt
- 1908570_CDF_material/2012_sm00-10cm_daily_ZDB_ZHY_56751_366days_allin.txt
- 1908570_CDF_material/2012_sm00-10cm_daily_ZDB_ZHY_56752_366days_allin.txt
- 1908570_CDF_material/2012_sm00-10cm_daily_ZDB_ZHY_56778_366days_allin.txt
- 1908570_CDF_material/2012_sm00-10cm_daily_ZDB_ZHY_56785_366days_allin.txt
- 1908570_CDF_material/2012_sm00-10cm_daily_ZDB_ZHY_56792_366days_allin.txt
- 1908570_CDF_material/2012_sm00-10cm_daily_ZDB_ZHY_56881_366days_allin.txt
- 1908570_CDF_material/2012_sm00-10cm_daily_ZDB_ZHY_56959_366days_allin.txt
- 1908570_CDF_material/2012_sm00-10cm_daily_ZDB_ZHY_56966_366days_allin.txt
- 1908570_CDF_material/2012_sm00-10cm_daily_ZDB_ZHY_57004_366days_allin.txt
- 1908570_CDF_material/2012_sm00-10cm_daily_ZDB_ZHY_57022_366days_allin.txt
- 1908570_CDF_material/2012_sm00-10cm_daily_ZDB_ZHY_57024_366days_allin.txt
- 1908570_CDF_material/2012_sm00-10cm_daily_ZDB_ZHY_57026_366days_allin.txt
- 1908570_CDF_material/2012_sm00-10cm_daily_ZDB_ZHY_57031_366days_allin.txt
- 1908570_CDF_material/2012_sm00-10cm_daily_ZDB_ZHY_57032_366days_allin.txt
- 1908570_CDF_material/2012_sm00-10cm_daily_ZDB_ZHY_57033_366days_allin.txt
- 1908570_CDF_material/2012_sm00-10cm_daily_ZDB_ZHY_57035_366days_allin.txt
- 1908570_CDF_material/2012_sm00-10cm_daily_ZDB_ZHY_57038_366days_allin.txt
- 1908570_CDF_material/2012_sm00-10cm_daily_ZDB_ZHY_57043_366days_allin.txt
- 1908570_CDF_material/2012_sm00-10cm_daily_ZDB_ZHY_57045_366days_allin.txt
- 1908570_CDF_material/2012_sm00-10cm_daily_ZDB_ZHY_57048_366days_allin.txt
- 1908570_CDF_material/2012_sm00-10cm_daily_ZDB_ZHY_57051_366days_allin.txt
- 1908570_CDF_material/2012_sm00-10cm_daily_ZDB_ZHY_57071_366days_allin.txt
- 1908570_CDF_material/2012_sm00-10cm_daily_ZDB_ZHY_57076_366days_allin.txt
- 1908570_CDF_material/2012_sm00-10cm_daily_ZDB_ZHY_57093_366days_allin.txt
- 1908570_CDF_material/2012_sm00-10cm_daily_ZDB_ZHY_57102_366days_allin.txt
- 1908570_CDF_material/2012_sm00-10cm_daily_ZDB_ZHY_57111_366days_allin.txt
- 1908570_CDF_material/2012_sm00-10cm_daily_ZDB_ZHY_57119_366days_allin.txt
- 1908570_CDF_material/2012_sm00-10cm_daily_ZDB_ZHY_57123_366days_allin.txt
- 1908570_CDF_material/2012_sm00-10cm_daily_ZDB_ZHY_57127_366days_allin.txt
- 1908570_CDF_material/2012_sm00-10cm_daily_ZDB_ZHY_57156_366days_allin.txt
- 1908570_CDF_material/2012_sm00-10cm_daily_ZDB_ZHY_57177_366days_allin.txt
- 1908570_CDF_material/2012_sm00-10cm_daily_ZDB_ZHY_57196_366days_allin.txt
- 1908570_CDF_material/2012_sm00-10cm_daily_ZDB_ZHY_57197_366days_allin.txt
- 1908570_CDF_material/2012_sm00-10cm_daily_ZDB_ZHY_57251_366days_allin.txt
- 1908570_CDF_material/2012_sm00-10cm_daily_ZDB_ZHY_57259_366days_allin.txt
- 1908570_CDF_material/2012_sm00-10cm_daily_ZDB_ZHY_57268_366days_allin.txt
- 1908570_CDF_material/2012_sm00-10cm_daily_ZDB_ZHY_57274_366days_allin.txt
- 1908570_CDF_material/2012_sm00-10cm_daily_ZDB_ZHY_57293_366days_allin.txt
- 1908570_CDF_material/2012_sm00-10cm_daily_ZDB_ZHY_57294_366days_allin.txt
- 1908570_CDF_material/2012_sm00-10cm_daily_ZDB_ZHY_57298_366days_allin.txt
- 1908570_CDF_material/2012_sm00-10cm_daily_ZDB_ZHY_57358_366days_allin.txt
- 1908570_CDF_material/2012_sm00-10cm_daily_ZDB_ZHY_57378_366days_allin.txt
- 1908570_CDF_material/2012_sm00-10cm_daily_ZDB_ZHY_57381_366days_allin.txt
- 1908570_CDF_material/2012_sm00-10cm_daily_ZDB_ZHY_57385_366days_allin.txt
- 1908570_CDF_material/2012_sm00-10cm_daily_ZDB_ZHY_57388_366days_allin.txt
- 1908570_CDF_material/2012_sm00-10cm_daily_ZDB_ZHY_57395_366days_allin.txt
- 1908570_CDF_material/2012_sm00-10cm_daily_ZDB_ZHY_57439_366days_allin.txt
- 1908570_CDF_material/2012_sm00-10cm_daily_ZDB_ZHY_57474_366days_allin.txt
- 1908570_CDF_material/2012_sm00-10cm_daily_ZDB_ZHY_57475_366days_allin.txt
- 1908570_CDF_material/2012_sm00-10cm_daily_ZDB_ZHY_57481_366days_allin.txt
- 1908570_CDF_material/2012_sm00-10cm_daily_ZDB_ZHY_57482_366days_allin.txt
- 1908570_CDF_material/2012_sm00-10cm_daily_ZDB_ZHY_57485_366days_allin.txt
- 1908570_CDF_material/2012_sm00-10cm_daily_ZDB_ZHY_57491_366days_allin.txt
- 1908570_CDF_material/2012_sm00-10cm_daily_ZDB_ZHY_57492_366days_allin.txt
- 1908570_CDF_material/2012_sm00-10cm_daily_ZDB_ZHY_57494_366days_allin.txt
- 1908570_CDF_material/2012_sm00-10cm_daily_ZDB_ZHY_57496_366days_allin.txt
- 1908570_CDF_material/2012_sm00-10cm_daily_ZDB_ZHY_57545_366days_allin.txt
- 1908570_CDF_material/2012_sm00-10cm_daily_ZDB_ZHY_57554_366days_allin.txt
- 1908570_CDF_material/2012_sm00-10cm_daily_ZDB_ZHY_57562_366days_allin.txt
- 1908570_CDF_material/2012_sm00-10cm_daily_ZDB_ZHY_57564_366days_allin.txt
- 1908570_CDF_material/2012_sm00-10cm_daily_ZDB_ZHY_57565_366days_allin.txt
- 1908570_CDF_material/2012_sm00-10cm_daily_ZDB_ZHY_57581_366days_allin.txt
- 1908570_CDF_material/2012_sm00-10cm_daily_ZDB_ZHY_57634_366days_allin.txt
- 1908570_CDF_material/2012_sm00-10cm_daily_ZDB_ZHY_57646_366days_allin.txt
- 1908570_CDF_material/2012_sm00-10cm_daily_ZDB_ZHY_57647_366days_allin.txt
- 1908570_CDF_material/2012_sm00-10cm_daily_ZDB_ZHY_57662_366days_allin.txt
- 1908570_CDF_material/2012_sm00-10cm_daily_ZDB_ZHY_57673_366days_allin.txt
- 1908570_CDF_material/2012_sm00-10cm_daily_ZDB_ZHY_57680_366days_allin.txt
- 1908570_CDF_material/2012_sm00-10cm_daily_ZDB_ZHY_57682_366days_allin.txt
- 1908570_CDF_material/2012_sm00-10cm_daily_ZDB_ZHY_57714_366days_allin.txt
- 1908570_CDF_material/2012_sm00-10cm_daily_ZDB_ZHY_57729_366days_allin.txt
- 1908570_CDF_material/2012_sm00-10cm_daily_ZDB_ZHY_57731_366days_allin.txt
- 1908570_CDF_material/2012_sm00-10cm_daily_ZDB_ZHY_57749_366days_allin.txt
- 1908570_CDF_material/2012_sm00-10cm_daily_ZDB_ZHY_57774_366days_allin.txt
- 1908570_CDF_material/2012_sm00-10cm_daily_ZDB_ZHY_57777_366days_allin.txt
- 1908570_CDF_material/2012_sm00-10cm_daily_ZDB_ZHY_57778_366days_allin.txt
- 1908570_CDF_material/2012_sm00-10cm_daily_ZDB_ZHY_57781_366days_allin.txt
- 1908570_CDF_material/2012_sm00-10cm_daily_ZDB_ZHY_57806_366days_allin.txt
- 1908570_CDF_material/2012_sm00-10cm_daily_ZDB_ZHY_57822_366days_allin.txt
- 1908570_CDF_material/2012_sm00-10cm_daily_ZDB_ZHY_57824_366days_allin.txt
- 1908570_CDF_material/2012_sm00-10cm_daily_ZDB_ZHY_57827_366days_allin.txt
- 1908570_CDF_material/2012_sm00-10cm_daily_ZDB_ZHY_57832_366days_allin.txt
- 1908570_CDF_material/2012_sm00-10cm_daily_ZDB_ZHY_57841_366days_allin.txt
- 1908570_CDF_material/2012_sm00-10cm_daily_ZDB_ZHY_57865_366days_allin.txt
- 1908570_CDF_material/2012_sm00-10cm_daily_ZDB_ZHY_57871_366days_allin.txt
- 1908570_CDF_material/2012_sm00-10cm_daily_ZDB_ZHY_57872_366days_allin.txt
- 1908570_CDF_material/2012_sm00-10cm_daily_ZDB_ZHY_57882_366days_allin.txt
- 1908570_CDF_material/2012_sm00-10cm_daily_ZDB_ZHY_57889_366days_allin.txt
- 1908570_CDF_material/2012_sm00-10cm_daily_ZDB_ZHY_57906_366days_allin.txt
- 1908570_CDF_material/2012_sm00-10cm_daily_ZDB_ZHY_57910_366days_allin.txt
- 1908570_CDF_material/2012_sm00-10cm_daily_ZDB_ZHY_57923_366days_allin.txt
- 1908570_CDF_material/2012_sm00-10cm_daily_ZDB_ZHY_57926_366days_allin.txt
- 1908570_CDF_material/2012_sm00-10cm_daily_ZDB_ZHY_57932_366days_allin.txt
- 1908570_CDF_material/2012_sm00-10cm_daily_ZDB_ZHY_57949_366days_allin.txt
- 1908570_CDF_material/2012_sm00-10cm_daily_ZDB_ZHY_57954_366days_allin.txt
- 1908570_CDF_material/2012_sm00-10cm_daily_ZDB_ZHY_57956_366days_allin.txt
- 1908570_CDF_material/2012_sm00-10cm_daily_ZDB_ZHY_57958_366days_allin.txt
- 1908570_CDF_material/2012_sm00-10cm_daily_ZDB_ZHY_57960_366days_allin.txt
- 1908570_CDF_material/2012_sm00-10cm_daily_ZDB_ZHY_57981_366days_allin.txt
- 1908570_CDF_material/2012_sm00-10cm_daily_ZDB_ZHY_58027_366days_allin.txt
- 1908570_CDF_material/2012_sm00-10cm_daily_ZDB_ZHY_58035_366days_allin.txt
- 1908570_CDF_material/2012_sm00-10cm_daily_ZDB_ZHY_58040_366days_allin.txt
- 1908570_CDF_material/2012_sm00-10cm_daily_ZDB_ZHY_58045_366days_allin.txt
- 1908570_CDF_material/2012_sm00-10cm_daily_ZDB_ZHY_58131_366days_allin.txt
- 1908570_CDF_material/2012_sm00-10cm_daily_ZDB_ZHY_58132_366days_allin.txt
- 1908570_CDF_material/2012_sm00-10cm_daily_ZDB_ZHY_58139_366days_allin.txt
- 1908570_CDF_material/2012_sm00-10cm_daily_ZDB_ZHY_58143_366days_allin.txt
- 1908570_CDF_material/2012_sm00-10cm_daily_ZDB_ZHY_58146_366days_allin.txt
- 1908570_CDF_material/2012_sm00-10cm_daily_ZDB_ZHY_58150_366days_allin.txt
- 1908570_CDF_material/2012_sm00-10cm_daily_ZDB_ZHY_58158_366days_allin.txt
- 1908570_CDF_material/2012_sm00-10cm_daily_ZDB_ZHY_58205_366days_allin.txt
- 1908570_CDF_material/2012_sm00-10cm_daily_ZDB_ZHY_58235_366days_allin.txt
- 1908570_CDF_material/2012_sm00-10cm_daily_ZDB_ZHY_58239_366days_allin.txt
- 1908570_CDF_material/2012_sm00-10cm_daily_ZDB_ZHY_58241_366days_allin.txt
- 1908570_CDF_material/2012_sm00-10cm_daily_ZDB_ZHY_58250_366days_allin.txt
- 1908570_CDF_material/2012_sm00-10cm_daily_ZDB_ZHY_58251_366days_allin.txt
- 1908570_CDF_material/2012_sm00-10cm_daily_ZDB_ZHY_58269_366days_allin.txt
- 1908570_CDF_material/2012_sm00-10cm_daily_ZDB_ZHY_58339_366days_allin.txt
- 1908570_CDF_material/2012_sm00-10cm_daily_ZDB_ZHY_58345_366days_allin.txt
- 1908570_CDF_material/2012_sm00-10cm_daily_ZDB_ZHY_58352_366days_allin.txt
- 1908570_CDF_material/2012_sm00-10cm_daily_ZDB_ZHY_58354_366days_allin.txt
- 1908570_CDF_material/2012_sm00-10cm_daily_ZDB_ZHY_58356_366days_allin.txt
- 1908570_CDF_material/2012_sm00-10cm_daily_ZDB_ZHY_58404_366days_allin.txt
- 1908570_CDF_material/2012_sm00-10cm_daily_ZDB_ZHY_58409_366days_allin.txt
- 1908570_CDF_material/2012_sm00-10cm_daily_ZDB_ZHY_58448_366days_allin.txt
- 1908570_CDF_material/2012_sm00-10cm_daily_ZDB_ZHY_58453_366days_allin.txt
- 1908570_CDF_material/2012_sm00-10cm_daily_ZDB_ZHY_58462_366days_allin.txt
- 1908570_CDF_material/2012_sm00-10cm_daily_ZDB_ZHY_58543_366days_allin.txt
- 1908570_CDF_material/2012_sm00-10cm_daily_ZDB_ZHY_58555_366days_allin.txt
- 1908570_CDF_material/2012_sm00-10cm_daily_ZDB_ZHY_58652_366days_allin.txt
- 1908570_CDF_material/2012_sm00-10cm_daily_ZDB_ZHY_58731_366days_allin.txt
- 1908570_CDF_material/2012_sm00-10cm_daily_ZDB_ZHY_58818_366days_allin.txt
- 1908570_CDF_material/2012_sm00-10cm_daily_ZDB_ZHY_58819_366days_allin.txt
- 1908570_CDF_material/2012_sm00-10cm_daily_ZDB_ZHY_58821_366days_allin.txt
- 1908570_CDF_material/2012_sm00-10cm_daily_ZDB_ZHY_58822_366days_allin.txt
- 1908570_CDF_material/2012_sm00-10cm_daily_ZDB_ZHY_58824_366days_allin.txt
- 1908570_CDF_material/2012_sm00-10cm_daily_ZDB_ZHY_58826_366days_allin.txt
- 1908570_CDF_material/2012_sm00-10cm_daily_ZDB_ZHY_58836_366days_allin.txt
- 1908570_CDF_material/2012_sm00-10cm_daily_ZDB_ZHY_58837_366days_allin.txt
- 1908570_CDF_material/2012_sm00-10cm_daily_ZDB_ZHY_58911_366days_allin.txt
- 1908570_CDF_material/2012_sm00-10cm_daily_ZDB_ZHY_58917_366days_allin.txt
- 1908570_CDF_material/2012_sm00-10cm_daily_ZDB_ZHY_58918_366days_allin.txt
- 1908570_CDF_material/2012_sm00-10cm_daily_ZDB_ZHY_58929_366days_allin.txt
- 1908570_CDF_material/2012_sm00-10cm_daily_ZDB_ZHY_58936_366days_allin.txt
- 1908570_CDF_material/2012_sm00-10cm_daily_ZDB_ZHY_58942_366days_allin.txt
- 1908570_CDF_material/2012_sm00-10cm_daily_ZDB_ZHY_59034_366days_allin.txt
- 1908570_CDF_material/2012_sm00-10cm_daily_ZDB_ZHY_59041_366days_allin.txt
- 1908570_CDF_material/2012_sm00-10cm_daily_ZDB_ZHY_59044_366days_allin.txt
- 1908570_CDF_material/2012_sm00-10cm_daily_ZDB_ZHY_59053_366days_allin.txt
- 1908570_CDF_material/2012_sm00-10cm_daily_ZDB_ZHY_59061_366days_allin.txt
- 1908570_CDF_material/2012_sm00-10cm_daily_ZDB_ZHY_59113_366days_allin.txt
- 1908570_CDF_material/2012_sm00-10cm_daily_ZDB_ZHY_59129_366days_allin.txt
- 1908570_CDF_material/2012_sm00-10cm_daily_ZDB_ZHY_59211_366days_allin.txt
- 1908570_CDF_material/2012_sm00-10cm_daily_ZDB_ZHY_59237_366days_allin.txt
- 1908570_CDF_material/2012_sm00-10cm_daily_ZDB_ZHY_59241_366days_allin.txt
- 1908570_CDF_material/2012_sm00-10cm_daily_ZDB_ZHY_59254_366days_allin.txt
- 1908570_CDF_material/2012_sm00-10cm_daily_ZDB_ZHY_59255_366days_allin.txt
- 1908570_CDF_material/2012_sm00-10cm_daily_ZDB_ZHY_59266_366days_allin.txt
- 1908570_CDF_material/2012_sm00-10cm_daily_ZDB_ZHY_59426_366days_allin.txt
- 1908570_CDF_material/2012_sm00-10cm_daily_ZDB_ZHY_59446_366days_allin.txt
- 1908570_CDF_material/2012_sm00-10cm_daily_ZDB_ZHY_59632_366days_allin.txt
- 1908570_CDF_material/2012_sm00-10cm_daily_ZDB_ZHY_651418_366days_allin.txt
- 1908570_CDF_material/2012_sm00-10cm_daily_ZDB_ZHY_651464_366days_allin.txt
- 1908570_CDF_material/2012_sm00-10cm_daily_ZDB_ZHY_651472_366days_allin.txt
- 1908570_CDF_material/2012_sm00-10cm_daily_ZDB_ZHY_679001_366days_allin.txt
- 1908570_CDF_material/2012_sm00-10cm_daily_ZDB_ZHY_679101_366days_allin.txt
- 1908570_CDF_material/2012_sm00-10cm_daily_ZDB_ZHY_679102_366days_allin.txt
- 1908570_CDF_material/2012_sm00-10cm_daily_ZDB_ZHY_679301_366days_allin.txt
- 1908570_CDF_material/2012_sm00-10cm_daily_ZDB_ZHY_679302_366days_allin.txt
- 1908570_CDF_material/2012_sm00-10cm_daily_ZDB_ZHY_680801_366days_allin.txt
- 1908570_CDF_material/2012_sm00-10cm_daily_ZDB_ZHY_680803_366days_allin.txt
- 1908570_CDF_material/2012_sm00-10cm_daily_ZDB_ZHY_680805_366days_allin.txt
- 1908570_CDF_material/2012_sm00-10cm_daily_ZDB_ZHY_680806_366days_allin.txt
- 1908570_CDF_material/2012_sm00-10cm_daily_ZDB_ZHY_680808_366days_allin.txt
- 1908570_CDF_material/2012_sm00-10cm_daily_ZDB_ZHY_680809_366days_allin.txt
- 1908570_CDF_material/2012_sm00-10cm_daily_ZDB_ZHY_680810_366days_allin.txt
- 1908570_CDF_material/2012_sm00-10cm_daily_ZDB_ZHY_681801_366days_allin.txt
- 1908570_CDF_material/2012_sm00-10cm_daily_ZDB_ZHY_681802_366days_allin.txt
- 1908570_CDF_material/2012_sm00-10cm_daily_ZDB_ZHY_681803_366days_allin.txt
- 1908570_CDF_material/2012_sm00-10cm_daily_ZDB_ZHY_681804_366days_allin.txt
- 1908570_CDF_material/2012_sm00-10cm_daily_ZDB_ZHY_681805_366days_allin.txt
- 1908570_CDF_material/2012_sm00-10cm_daily_ZDB_ZHY_681806_366days_allin.txt
- 1908570_CDF_material/2012_sm00-10cm_daily_ZDB_ZHY_681809_366days_allin.txt
- 1908570_CDF_material/2012_sm00-10cm_daily_ZDB_ZHY_681810_366days_allin.txt
- 1908570_CDF_material/2012_sm00-10cm_daily_ZDB_ZHY_681811_366days_allin.txt
- 1908570_CDF_material/2012_sm00-10cm_daily_ZDB_ZHY_682806_366days_allin.txt
- 1908570_CDF_material/2012_sm00-10cm_daily_ZDB_ZHY_682807_366days_allin.txt
- 1908570_CDF_material/2012_sm00-10cm_daily_ZDB_ZHY_682808_366days_allin.txt
- 1908570_CDF_material/2012_sm00-10cm_daily_ZDB_ZHY_682809_366days_allin.txt
- 1908570_CDF_material/2012_sm00-10cm_daily_ZDB_ZHY_682810_366days_allin.txt
- 1908570_CDF_material/2012_sm00-10cm_daily_ZDB_ZHY_682813_366days_allin.txt
- 1908570_CDF_material/2012_sm00-10cm_daily_ZDB_ZHY_684808_366days_allin.txt
- 1908570_CDF_material/2012_sm00-10cm_daily_ZDB_ZHY_684809_366days_allin.txt
[truncated: 76 more entries]
